# Supplementary material
Source: publisher figshare collection journal article supplement (https://brill.figshare.com/ndownloader/files/26687594)
Supplement: Supplementary file 1 [file 26687594]

## Sheet: List1
Table S1. Specimens of Zebrus zebrus, Z. pallaoroi sp. nov. and Millerigobius macrocephalus used in the genetic analyses, with details on their origin and haplotypes, and GenBank accession numbers. NMP (National Museum, Prague, Czech Republic), PMR (Natural History Museum, Rijeka, Croatia).
species	genetic sample no.	voucher	month	year	locality	country	decimal degrees	used for morphology	cyt b haplotype	cyt b GenBank Acc.No	rhod allele 1	rhod allele 2	rhodopsin allele1 GenBank Acc.No	rhodopsin allele2 GenBank Acc.No
Zebrus pallaoroi	J112	NMP P6V 144300	08	2016	Kostanjica, Boka Kotorska	Montenegro	42.485139° N, 18.670347° E	Paratype, x-ray	H61	MW196296	H10	H11	MW195504	MW195501
Zebrus pallaoroi	J136	NMP P6V 144302	08	2016	Kostanjica, Boka Kotorska	Montenegro	42.485139° N, 18.670347° E	HOLOTYPE, x-ray	H62	MW196297	H10	H13	MW195504	MW195503
Zebrus pallaoroi	J160	NMP P6V 144303	08	2016	Kostanjica, Boka Kotorska	Montenegro	42.485139° N, 18.670347° E	Paratype, x-ray	H62	MW196297	H11	H12	MW195501	MW195502
Zebrus pallaoroi	MNE3	NMP, tissue	8	2015	Kostanjica, Boka Kotorska	Montenegro	42.485139° N, 18.670347° E		H60	MW196295	H11	H11	MW195501	MW195501
Zebrus pallaoroi	H1650	NMP, tissue	7	2014	Syvota	Greece	39.399722° N, 20.234722° E		H59	MW196294	H12	H14	MW195502	MW195505
Zebrus pallaoroi	L288	NMP, tissue	6	2019	Gavradia	Greece	40.440278° N, 23.839722° E		H64	MW196299	H13	H13	MW195503	MW195503
Zebrus pallaoroi	H1723	NMP, tissue	10	2012	Petalii Islands, Euboia Island	Greece	38.014722° N, 24.280833° E		H63	MW196298	H15	H15	MW195506	MW195506
Zebrus zebrus	D2792	NMP P6V 140912	10	2011	Ill Gross, Banyuls s/M	France	42.482106° N, 3.136933° E	NEOTYPE	H2	MW196300	H5	H5	MW195507	MW195507
Zebrus zebrus	D2793	NMP uncatalogued	10	2011	Ill Gross, Banyuls s/M	France	42.482106° N, 3.136933° E		H1	MW196301	H5	H5	MW195507	MW195507
Zebrus zebrus	D2906	NMP uncatalogued	10	2011	Ill Gross, Banyuls s/M	France	42.482106° N, 3.136933° E		H2	MW196300	H5	H5	MW195507	MW195507
Zebrus zebrus	D1414	NMP P6V 89915	9	2010	Selce	Croatia	45.151944° N, 14.720833° E		H25	MW196324	H5	H5	MW195507	MW195507
Zebrus zebrus	D1492	NMP P6V 89999	10	2010	beach Sveti Marak, Krk Island	Croatia	45.105000° N, 14.664444° E		H32	MW196331	H5	H5	MW195507	MW195507
Zebrus zebrus	MNE4	NMP uncatalogued	8	2015	Veslo, Luštica	Montenegro	42.365278° N, 18.611944° E		H4	MW196303	H5	H5	MW195507	MW195507
Zebrus zebrus	MNE6	NMP uncatalogued	8	2015	Veslo, Luštica	Montenegro	42.365278° N, 18.611944° E		H6	MW196305	H5	H5	MW195507	MW195507
Zebrus zebrus	F1878	NMP, uncatalogued	9	2013	Faro	Portugal	37.021389° N, 8.046667° W		H7	MW196306	H5	H5	MW195507	MW195507
Zebrus zebrus	G607	NMP P6V 145219	10	2014	Kamenjak, Krk Island	Croatia	45.072500° N, 14.734722° E	yes	H14	MW196313	H5	H6	MW195507	MW195508
Zebrus zebrus	G608	NMP P6V 145220	10	2014	Kamenjak, Krk Island	Croatia	45.072500° N, 14.734722° E	yes	H15	MW196314	H5	H7	MW195507	MW195509
Zebrus zebrus	J887	NMP uncatalogued	5	2017	Selce	Croatia	45.151944° N, 14.720833° E		H17	MW196316	H5	H8	MW195507	MW195510
Zebrus zebrus	MNE5	NMP uncatalogued	8	2015	Veslo, Luštica	Montenegro	42.365278° N, 18.611944° E		H5	MW196304	H5	H9	MW195507	MW195511
Zebrus zebrus	D1413	NMP P6V 89911	9	2010	Selce	Croatia	45.151944° N, 14.720833° E		H40	MW196339	H7	H7	MW195509	MW195509
Zebrus zebrus	G602	NMP P6V 145214	10	2014	Kamenjak, Krk Island	Croatia	45.072500° N, 14.734722° E	yes	H10	MW196309
Zebrus zebrus	G603	NMP P6V 145215	10	2014	Kamenjak, Krk Island	Croatia	45.072500° N, 14.734722° E	yes	H11	MW196310
Zebrus zebrus	G604	NMP P6V 145216	10	2014	Kamenjak, Krk Island	Croatia	45.072500° N, 14.734722° E	yes	H11	MW196310
Zebrus zebrus	G605	NMP P6V 145217	10	2014	Kamenjak, Krk Island	Croatia	45.072500° N, 14.734722° E	yes	H12	MW196311
Zebrus zebrus	C1745	NMP P6V 142593	05	2012	Selce	Croatia	45.151944° N, 14.720833° E	yes	H13	MW196312
Zebrus zebrus	G606	NMP P6V 145218	10	2014	Kamenjak, Krk Island	Croatia	45.072500° N, 14.734722° E	yes	H13	MW196312
Zebrus zebrus	D809	NMP P6V 89017	05	2010	punta Glavina, Krk Island	Croatia	45.067467° N, 14.737683° E	yes	H13	MW196312
Zebrus zebrus	D1486	NMP uncatalogued	10	2010	beach Sveti Marak, Krk Island	Croatia	45.105000° N, 14.664444° E		H13	MW196312
Zebrus zebrus	D1498	NMP P6V 89987	10	2010	Selce	Croatia	45.151944° N, 14.720833° E		H13	MW196312
Zebrus zebrus	RK24	NMP P6V 87333	10	2007	Oštro Penninsula, Kraljevica	Croatia	45.266111° N, 14.562500° E		H16	MW196315
Zebrus zebrus	J890	NMP uncatalogued	5	2017	Selce	Croatia	45.151944° N, 14.720833° E		H18	MW196317
Zebrus zebrus	D816	NMP P6V 89018	05	2010	punta Glavina, Krk Island	Croatia	45.067467° N, 14.737683° E	yes	H19	MW196318
Zebrus zebrus	D1384	NMP uncatalogued	9	2010	Selce	Croatia	45.151944° N, 14.720833° E		H20	MW196319
Zebrus zebrus	C1744	NMP P6V 142592	05	2012	Selce	Croatia	45.151944° N, 14.720833° E	yes	H21	MW196320
Zebrus zebrus	C1746	NMP P6V 142594	05	2012	Selce	Croatia	45.151944° N, 14.720833° E	yes	H22	MW196321
Zebrus zebrus	C1747	NMP P6V 142595	05	2012	Selce	Croatia	45.151944° N, 14.720833° E	yes	H22	MW196321
Zebrus zebrus	C1778	NMP P6V 142530	05	2012	Sveti Marak, Krk Island	Croatia	45.105944° N, 14.668500° E	yes	H23	MW196322
Zebrus zebrus	C1788	NMP P6V 142596	05	2012	Selce	Croatia	45.151944° N, 14.720833° E	yes	H24	MW196323
Zebrus zebrus	D1467	NMP uncatalogued	10	2010	Selce	Croatia	45.151944° N, 14.720833° E		H24	MW196323
Zebrus zebrus	C1789	NMP P6V 142597	05	2012	Selce	Croatia	45.151944° N, 14.720833° E	yes	H25	MW196324
Zebrus zebrus	C1876	NMP P6V 142598	05	2012	Selce	Croatia	45.151944° N, 14.720833° E	yes	H26	MW196325
Zebrus zebrus	C1877	NMP P6V 142599	05	2012	Selce	Croatia	45.151944° N, 14.720833° E	yes	H27	MW196326
Zebrus zebrus	G583	NMP P6V 145287	10	2014	Selce	Croatia	45.151944° N, 14.720833° E	yes, x-ray	H28	MW196327
Zebrus zebrus	G584	NMP P6V 145288	10	2014	Selce	Croatia	45.151944° N, 14.720833° E	yes, x-ray	H29	MW196328
Zebrus zebrus	D1296	NMP uncatalogued	8	2010	Jaz	Montenegro	42.284167° N, 18.808611° E		H3	MW196302
Zebrus zebrus	G585	NMP P6V 145289	10	2014	Selce	Croatia	45.151944° N, 14.720833° E	yes, x-ray	H30	MW196329
Zebrus zebrus	G586	NMP P6V 145290	10	2014	Selce	Croatia	45.151944° N, 14.720833° E	yes, x-ray	H31	MW196330
Zebrus zebrus	C1742	NMP P6V 142590	05	2012	Selce	Croatia	45.151944° N, 14.720833° E		H33	MW196332
Zebrus zebrus	C1743	NMP P6V 142591	05	2012	Selce	Croatia	45.151944° N, 14.720833° E		H34	MW196333
Zebrus zebrus	J888	NMP uncatalogued	5	2017	Selce	Croatia	45.151944° N, 14.720833° E		H35	MW196334
Zebrus zebrus	D1406	NMP uncatalogued	9	2010	Vrbnik, Krk Island	Croatia	45.080750° N, 14.674733° E		H36	MW196335
Zebrus zebrus	J889	NMP uncatalogued	5	2017	Selce	Croatia	45.151944° N, 14.720833° E		H36	MW196335
Zebrus zebrus	D1403	NMP P6V 89929	9	2010	Vrbnik, Krk Island	Croatia	45.080750° N, 14.674733° E		H37	MW196336
Zebrus zebrus	D1404	NMP P6V 89930	9	2010	Vrbnik, Krk Island	Croatia	45.080750° N, 14.674733° E		H38	MW196337
Zebrus zebrus	D1405	NMP uncatalogued	9	2010	Vrbnik, Krk Island	Croatia	45.080750° N, 14.674733° E		H39	MW196338
Zebrus zebrus	D1421	NMP P6V 89910	9	2010	Selce	Croatia	45.151944° N, 14.720833° E		H41	MW196340
Zebrus zebrus	D1422	NMP P6V 89913	9	2010	Selce	Croatia	45.151944° N, 14.720833° E		H42	MW196341
Zebrus zebrus	D1423	NMP P6V 89914	9	2010	Selce	Croatia	45.151944° N, 14.720833° E		H43	MW196342
Zebrus zebrus	D1436	NMP uncatalogued	9	2010	Selce	Croatia	45.151944° N, 14.720833° E		H44	MW196343
Zebrus zebrus	D1437	NMP P6V 89916	9	2010	Selce	Croatia	45.151944° N, 14.720833° E		H45	MW196344
Zebrus zebrus	D1451	NMP P6V 89912	9	2010	Selce	Croatia	45.151944° N, 14.720833° E		H46	MW196345
Zebrus zebrus	D1458	NMP uncatalogued	10	2010	Selce	Croatia	45.151944° N, 14.720833° E		H47	MW196346
Zebrus zebrus	D1402	NMP P6V 89928	9	2010	Vrbnik, Krk Island	Croatia	45.080750° N, 14.674733° E		H6	MW196305
Zebrus zebrus	G600	NMP P6V 145212	10	2014	Kamenjak, Krk Island	Croatia	45.072500° N, 14.734722° E	yes	H8	MW196307
Zebrus zebrus	G601	NMP P6V 145213	10	2014	Kamenjak, Krk Island	Croatia	45.072500° N, 14.734722° E	yes	H9	MW196308
Millerigobius macrocephalus	J77	NMP P6V 144416	08	2016	Strp, Boka Kotorska	Montenegro	42.503989° N, 18.669453° E	yes, x-ray	H49	MW196348	H1	H1	MW195512	MW195512
Millerigobius macrocephalus	J78	NMP P6V 144417	08	2016	Strp, Boka Kotorska	Montenegro	42.503989° N, 18.669453° E	yes, x-ray	H49	MW196348	H1	H1	MW195512	MW195512
Millerigobius macrocephalus	J79	NMP P6V 144418	08	2016	Strp, Boka Kotorska	Montenegro	42.503989° N, 18.669453° E	yes, x-ray	H50	MW196349	H1	H1	MW195512	MW195512
Millerigobius macrocephalus	H1145	NMP uncatalogued	10	2015	Aci Trezza, Sicily	Italy	37.562758° N, 15.163661° E	yes	H52	MW196351	H1	H1	MW195512	MW195512
Millerigobius macrocephalus	Miller	PMR VP2415	6	2010	Unije Island, rt Arbit	Croatia	44.604000° N, 14.280000° E		H58	MW196357	H1	H1	MW195512	MW195512
Millerigobius macrocephalus	H1722	NMP uncatalogued	10	2012	Petalii Islands, Euboia Island	Greece	38.012500° N, 24.279722° E		H48	MW196347	H1	H2	MW195512	MW195513
Millerigobius macrocephalus	H1146	NMP P6V 145158	10	2015	Aci Trezza, Sicily	Italy	37.562758° N, 15.163661° E		H52	MW196351	H1	H2	MW195512	MW195513
Millerigobius macrocephalus	J37	NMP P6V 144301	08	2016	Kostanjica, Boka Kotorska,	Montenegro	42.485139° N, 18.670347° E	x-ray	H53	MW196352	H1	H2	MW195512	MW195513
Millerigobius macrocephalus	J1734	NMP uncatalogued	11	2017	Cyclops cave, Cavo Greco	Cyprus	34.985556° N, 34.076944° E		H55	MW196354	H1	H2	MW195512	MW195513
Millerigobius macrocephalus	J1735	NMP uncatalogued	11	2017	Cyclops cave, Cavo Greco	Cyprus	34.985556° N, 34.076944° E		H56	MW196355	H1	H2	MW195512	MW195513
Millerigobius macrocephalus	J1736	NMP uncatalogued	11	2017	Cyclops cave, Cavo Greco	Cyprus	34.985556° N, 34.076944° E		H57	MW196356	H1	H2	MW195512	MW195513
Millerigobius macrocephalus	J1733	NMP uncatalogued	11	2017	Cyclops cave, Cavo Greco	Cyprus	34.985556° N, 34.076944° E		H54	MW196353	H3	H4	MW195514	MW195515
Millerigobius macrocephalus	H1709	NMP uncatalogued	10	2012	Arhampolis, loc. 2	Greece	38.088889° N, 24.580000° E		H48	MW196347
Millerigobius macrocephalus	D2698	NMP P6V 142686	10	2011	Ill Gross, Banyuls s/M	France	42.482106° N, 3.136933° E	yes	H51	MW196350
